# Supplementary material for: Adipose tissue mitochondrial dysfunction in human obesity is linked to a specific DNA methylation signature in adipose-derived stem cells
Source: PubMed Central journal article supplement (PMC6760577; doi:10.1038/s41366-018-0219-6), 2018-09-27
Supplement: 41366_2018_219_MOESM2_ESM.pdf [file 41366_2018_219_MOESM2_ESM.pdf]

| Detector               | Gene name                                              |
|------------------------|--------------------------------------------------------|
| TBX15-Hs01070089_m1    | T-box 15                                               |
| PRDM16-Hs00223161_m1   | PR domain 16                                           |
| ACLY-Hs00982738_m1     | ATP citrate lyase                                      |
| GLI2-Hs01119974_m1     | GLI family zinc finger 2                               |
| LSP1-Hs00158886_m1     | Lymphocyte-specific protein 1                          |
| POU3F3-Hs00275987_s1   | POU class 3 homeobox 3                                 |
| CCL4-Hs99999148_m1     | C-C motif chemokine ligand 4                           |
| CDKN1A-Hs00355782_m1   | Cyclin dependent kinase inhibitor 1A                   |
| PGC1a-Hs00173304_m1    | PPARG coactivator 1 alpha                              |
| UCP1-Hs01084772_m1     | Uncoupling protein 1                                   |
| GLUT4-Hs00168966_m1    | Glucose transporter type 4                             |
| HK2-Hs00606086_m1      | Hexokinase 2                                           |
| PFKM-Hs00175997_m1     | Phosphofructokinase M                                  |
| PDK1-Hs01561847_m1     | Pyruvate dehydrogenase kinase, isozyme 1               |
| PDK4-Hs01037712_m1     | Pyruvate dehydrogenase kinase, isozyme 4               |
| SDHb-Hs01042482_m1     | Succinate dehydrogenase b                              |
| PDH-Hs01081518_s1      | pyruvate dehydrogenase phosphatase catalytic subunit 1 |
| OGDH-Hs01081865_m1     | Alpha-ketoglutarate dehydrogenase                      |
| LDHa-Hs01378790_s1     | Lactate dehydrogenase a                                |
| LDHb-Hs00929956_m1     | Lactate dehydrogenase b                                |
| CPT1a-Hs00912671_m1    | Carnitine palmitoyltransferase 1A                      |
| CPT1b-Hs00189258_m1    | Carnitine palmitoyltransferase 1B                      |
| SLC25A20-Hs00386383_m1 | Solute carrier family 25 member 2                      |
| ACAA1-Hs01576064_g1    | Acetyl-CoA acyltransferase 1                           |
| TBX1-Hs00962558_g1     | T-box 1                                                |
| TMEM26-Hs00415619_m1   | Transmembrane protein 26                               |
| NDUFA9-Hs00245308_m1   | NADH:ubiquinone oxidoreductase subunit A9              |
| COX4L1-Hs00971639_m1   | Cytochrome c oxidase subunit 4L1                       |
| OPA1-Hs01047013_m1     | OPA1, mitochondrial dynamin like GTPase                |
| PORIN-Hs01631624_gH    | Voltage dependent anion channel 1                      |

**Supplementary Table S1. Human gene expression analysis.** Results were calculated using the comparative Ct method and expressed relative to the expression of the housekeeping genes 18S (Hs03928985\_g1).

| logFC      | p-value     | probeID    | CHR | gene | Localization    |
|------------|-------------|------------|-----|------|-----------------|
| 0,2592854  | 1,57245E-06 | cg14624731 | 2   | GLI2 | IGR - open sea  |
| 0,1097032  | 0,000382328 | cg05403744 | 2   | GLI2 | Body - island   |
| 0,06061764 | 0,000641159 | cg08561286 | 2   | GLI2 | Body - open sea |
| 0,07085017 | 0,008165607 | cg15699099 | 2   | GLI2 | IGR - open sea  |
| -0,0189977 | 0,008590543 | cg07855121 | 2   | GLI2 | Body - open sea |
| -0,0273136 | 0,010291827 | cg07133097 | 2   | GLI2 | IGR - shore     |
| -0,0337513 | 0,011179139 | cg03253309 | 2   | GLI2 | Body - open sea |
| 0,02735958 | 0,012177626 | cg18414033 | 2   | GLI2 | IGR - open sea  |
| 0,07679371 | 0,013920025 | cg10559151 | 2   | GLI2 | Body - open sea |
| 0,0738779  | 0,016978622 | cg21133992 | 2   | GLI2 | Body - open sea |

**Supplementary Table S2.** Methylation b-values of the different *GLI2* DMSs from the Infinium 450K CpG array.

|                            | <b>LEAN (n=11)</b> | <b>OBESE (n=32)</b> | <b>p</b> |
|----------------------------|--------------------|---------------------|----------|
| Age (yr)                   | 53.09 (21.63)      | 54.06 (12.18)       | 0.890    |
| Gender (M/F)               | 8/3                | 16/16               | 0.190    |
| BMI (kg/m <sup>2</sup> )   | 22.73 (1.77)       | 30.43 (4.65)        | <0.001   |
| Waist (cm)                 | 80 (9.95)          | 103.71 (7.93)       | <0.001   |
| Hip (cm)                   | 93.43 (6.58)       | 103.44 (12.71)      | 0.064    |
| SBP (mmHg)                 | 122.60 (13.56)     | 131.40 (17.44)      | 0.344    |
| DBP (mmHg)                 | 70.40 (7.63)       | 72.40 (7.85)        | 0.648    |
| Total cholesterol (mmol/l) | 5.45(1.36)         | 4.96 (1.04)         | 0.302    |
| HDL-cholesterol (mmol/l)   | 1.64 (0.4)         | 1.36 (0.44)         | 0.143    |
| Triglycerides (mmol/l)     | 0.85 (0.74-1.36)   | 1.06 (0.76-1.47)    | 0.523    |
| HOMA-IR                    | 1.09 (0.47-1.51)   | 1.16 (0.74-3.09)    | 0.355    |
| Glucose (mM)               | 4.61 (4.44-5.56)   | 5.44 (4.85-5.69)    | 0.194    |
| Insulin ( $\mu$ IU/ml)     | 4.70 (2.36-7.74)   | 4.49 (2.83-12.58)   | 0.643    |

**Supplementary Table S3.** Anthropometric and biochemical variables. Data are presented as mean (SEM) or median (25th-75th) quartiles as appropriate. T-test pairs and NPAR tests (Wilcoxon)

| <b>Antibody</b> | <b>Lean</b> | <b>Obese</b> |
|-----------------|-------------|--------------|
| <b>CD34</b>     | 0.13±0.1    | 0.1±0.1      |
| <b>CD45</b>     | 0.5±0.3     | 0.4±0.3      |
| <b>CD73</b>     | 92.3±5.4    | 92.9±5.5     |
| <b>CD90</b>     | 93.3±3      | 95.2±4.3     |

**Supplementary Table S4. Immunophenotypic characterization of the isolate hASCs.** The values reflect the mean ± SD percent surface positive staining of hASCs for several surface antigens including hematopoietic and stromal markers (n= 6).

|                     | <b>LSP1</b>                 | <b>ACLY</b>                   | <b>PRDM16</b>              |
|---------------------|-----------------------------|-------------------------------|----------------------------|
| <b>PCR external</b> |                             |                               |                            |
| <b>Forward</b>      | GGTGTATGTTGGGTTGTTATATG     | ATTTTTATGGATTGTTGTTGGTT       | AGTTTTAAATTGGAAATTTGTATT   |
| <b>Reverse</b>      | TCAACCCAAAATTCAATTCATAAT    | ACCCTTTCACCCCTTACTCTAATAC     | CTACATCTCCCAAAAACTAAAACC   |
| <b>PCR Internal</b> |                             |                               |                            |
| <b>Forward</b>      | TTTTGGTAGTTGTTTATGTATTTTTTT | GTTTTGAGGTTGAGTTATTGTGTTTT    | Forward external           |
| <b>Reverse</b>      | AAATCAAACAAAATCCCTAAAACCTC  | CTTACCCACTCTTAACCTCCTCTAAA    | AAACACCTAACCCCATTAATCAC    |
|                     | <b>GLI2</b>                 | <b>TBX15 A</b>                | <b>TBX15 B</b>             |
| <b>PCR external</b> |                             |                               |                            |
| <b>Forward</b>      | GTTTAGTTGTTGGGAGTGTTTAGAG   | AAGATTAGATTTTTTGGGTTTTTT      | GAGATAGGAAAAGTTTTTGTAGAAAG |
| <b>Reverse</b>      | CCCATAATCCTATATAATTTATCAC   | ATCTCCAATCCTAATACCCTAATC      | AAAATTCCTTATCCCTAACTCAAC   |
| <b>PCR Internal</b> |                             |                               |                            |
| <b>Forward</b>      | GGAAGTTTTTAAAAATGATGTGGTT   | AAAATAATAATAAGAAATTTAATAGGTTG | TTTTAATAGGGTAATAGGGTGAATA  |
| <b>Reverse</b>      | CCCCTCCATAACTCCTATATAAT     | ATTCTATCCTTTACAAAAAACC        | Reverse external           |

**Supplementary Table S5.** Bisulphite sequencing primers used for validation of the methylation status.

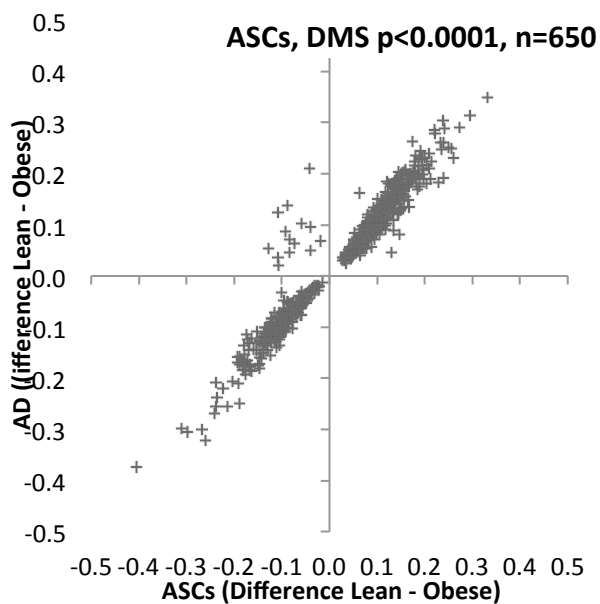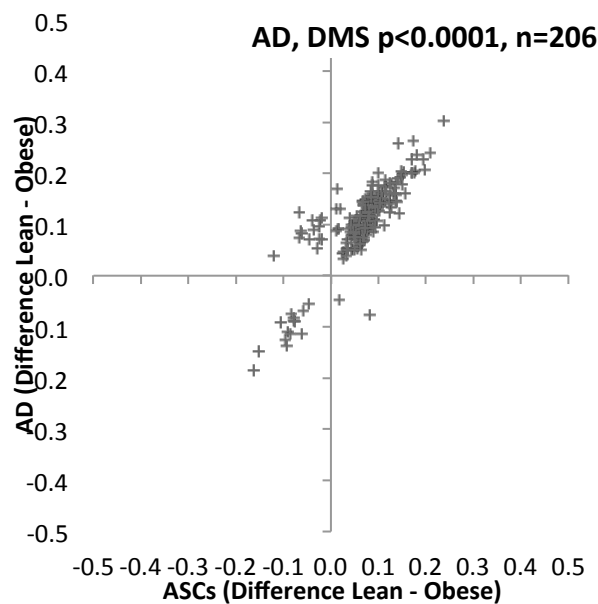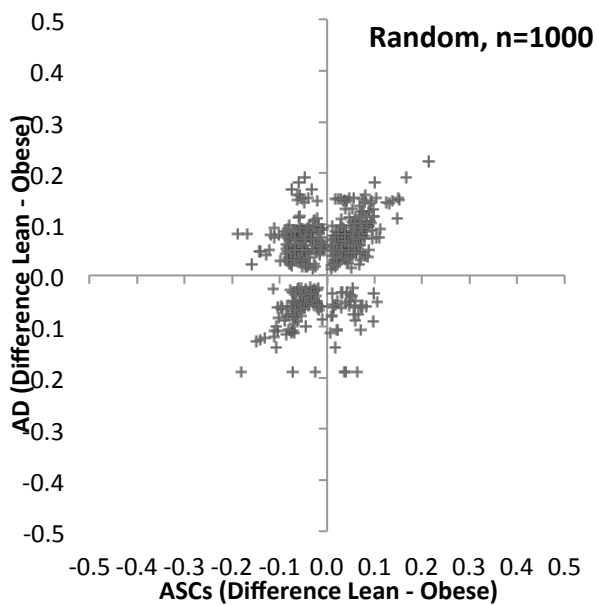

**Supplementary Figure S1.** Distribution of beta values differences between Lean and Obese by tissue type in Differentially Methylated Sites (DMS) with a  $p$ -value  $< 0.0001$  in ASCs, AD, ASCs and AD, and random selection of sites (not considering the  $p$ -value).

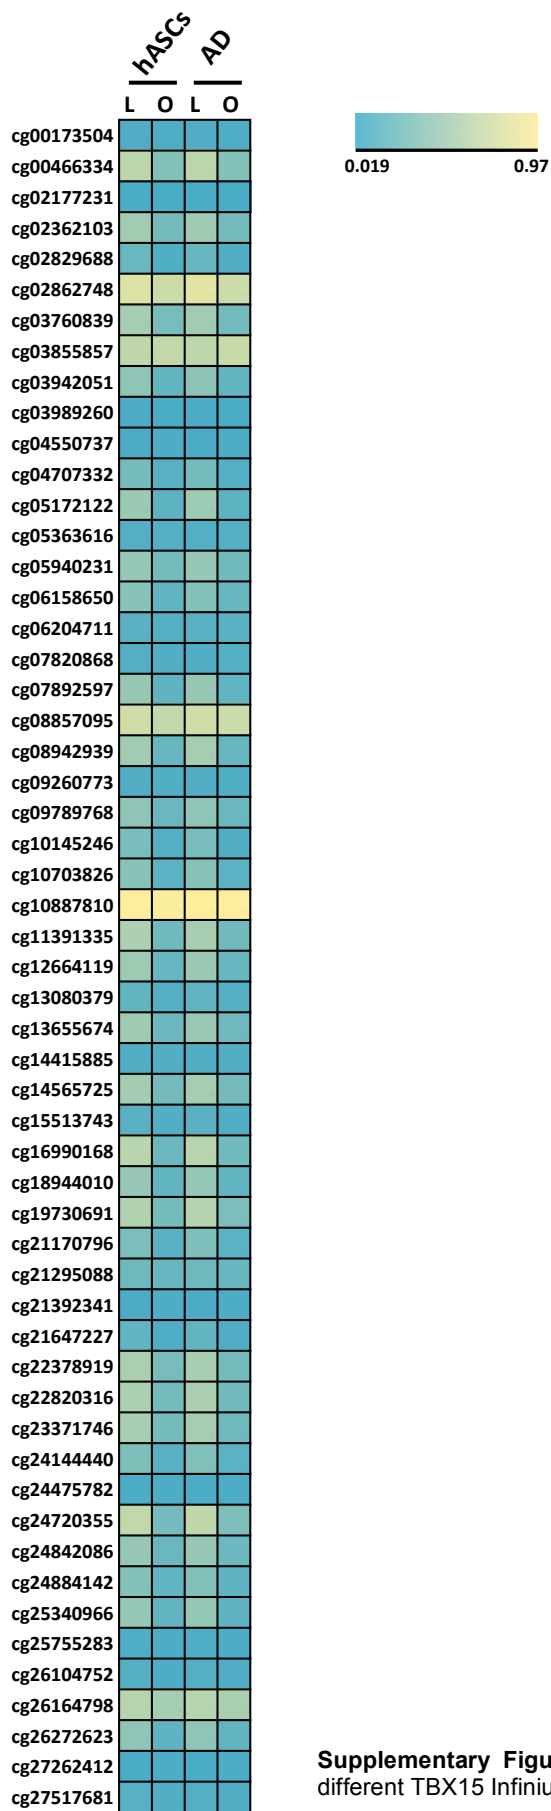

**Supplementary Figure S2.** Heatmap showing the methylation b-values of the different TBX15 Infinium 450K CpG targets.

## Supplementary figure S3

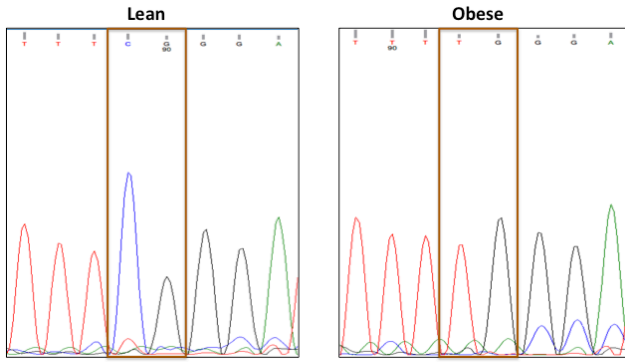

**Supplementary figure S3. TBX15 DNA sequencing results following bisulfite treatment.** The recovered hASCs DNA was processed using the EZ DNA Methylation Kit, amplified by PCR and sequenced directly. The methylated cytosine (lean) remains intact while the unmethylated cytosine (obese) are completely converted into uracil following bisulfite treatment (detected as thymine following PCR).



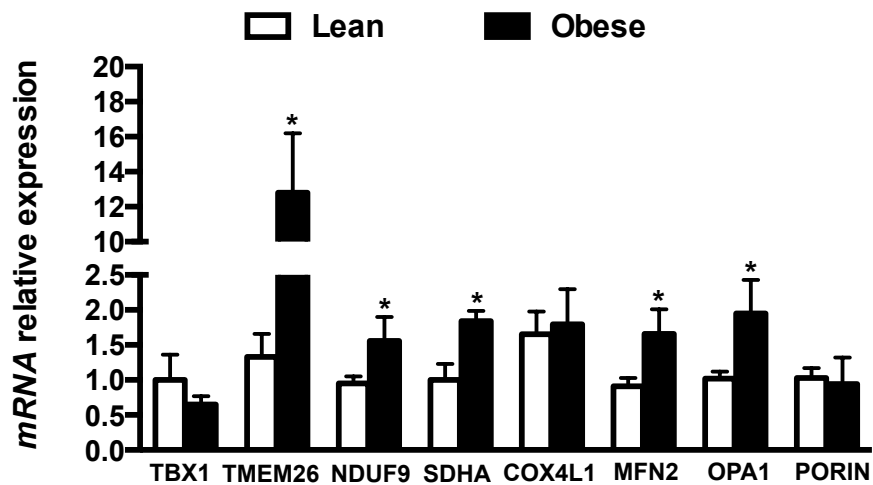

**Supplementary figure S4.** hASCs isolated from lean and obese subjects were subjected to quantitative PCR (qPCR) analysis of the expression of brown and beige markers, mitochondrial redox carriers and mitochondrial fusion genes (n=4, patients per group). t-test; and \*, p<0.05 vs lean cells

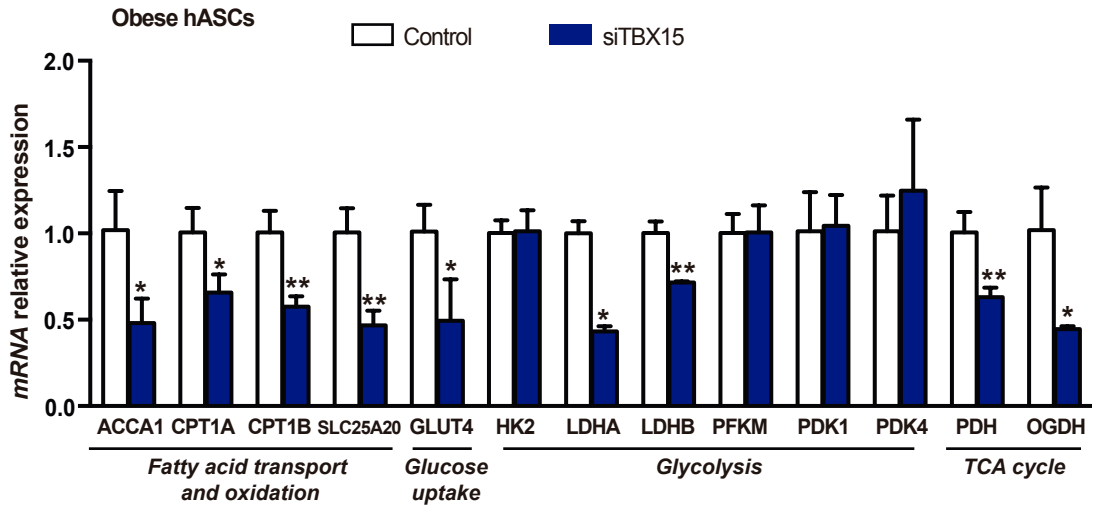

**Supplementary figure S5.** hASCs isolated from obese subjects were transfected with 100 nM of siRNAs against TBX15 or control followed by quantitative PCR (qPCR) analysis of the expression fatty acid transport and oxidation, glycolysis and TCA cycle genes (n=4, patients per group). t-test; \*\*, p<0.001 and \*, p<0.05 vs control cells.

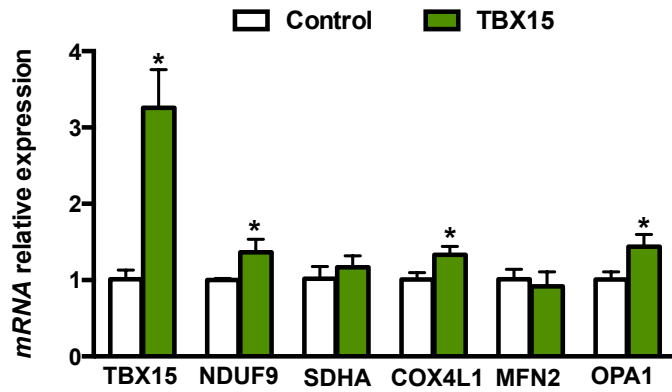

**Supplementary figure S6.** hASCs isolated from lean subjects were infected with recombinant adenovirus GFP-TBX15 and 48h after infection followed by quantitative PCR (qPCR) analysis of the expression of mitochondrial markers (n=4). t-test; \*, p<0.05 vs control cells.

## Supplementary figure S7

A

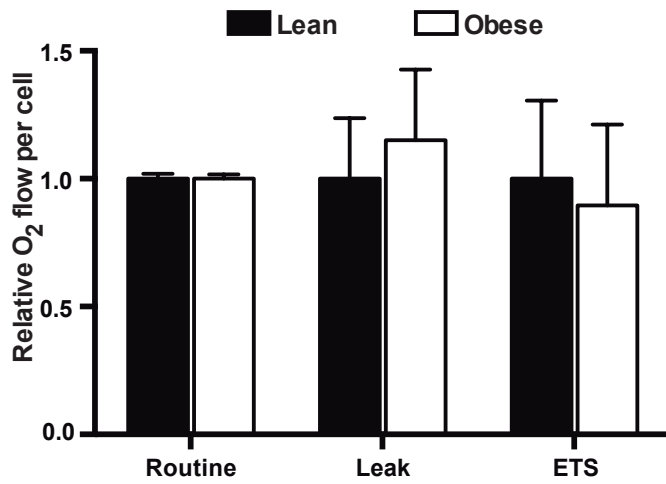

B

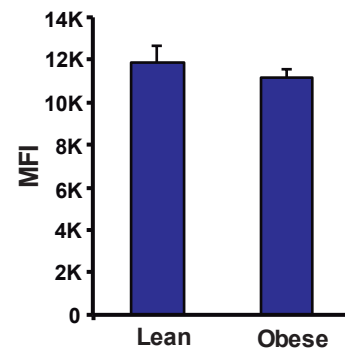

C

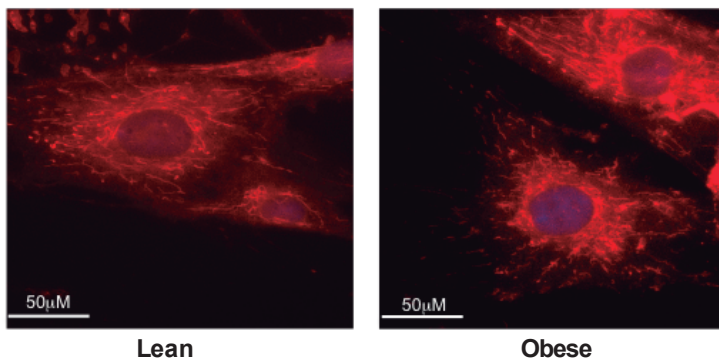

**Supplementary Figure S7. Mitochondrial phenotype of hASCs.** A) Oroboros (Ok2) was used to measure oxygen consumption in intact hASCs. B) Mitotracker® Green FM staining and quantification by flow cytometry in hASCs derived from lean and obese individuals. C) Metabolic activity of hASCs derived from lean and obese individuals measured by Mitotracker® Red CMXRos staining (40x). Values are expressed as mean ± SEM (n=3).
